# Supplementary material for: Postoperative Complications of Laparoscopic Total Gastrectomy versus Open Total Gastrectomy for Gastric Cancer in a Meta-Analysis of High-Quality Case-Controlled Studies
Source: Hindawi journal article supplement (doi:10.1155/2016/2617903), 2016-01-01
Supplement: f1 [file 2617903.f1.pdf]

# Supplementary 1A

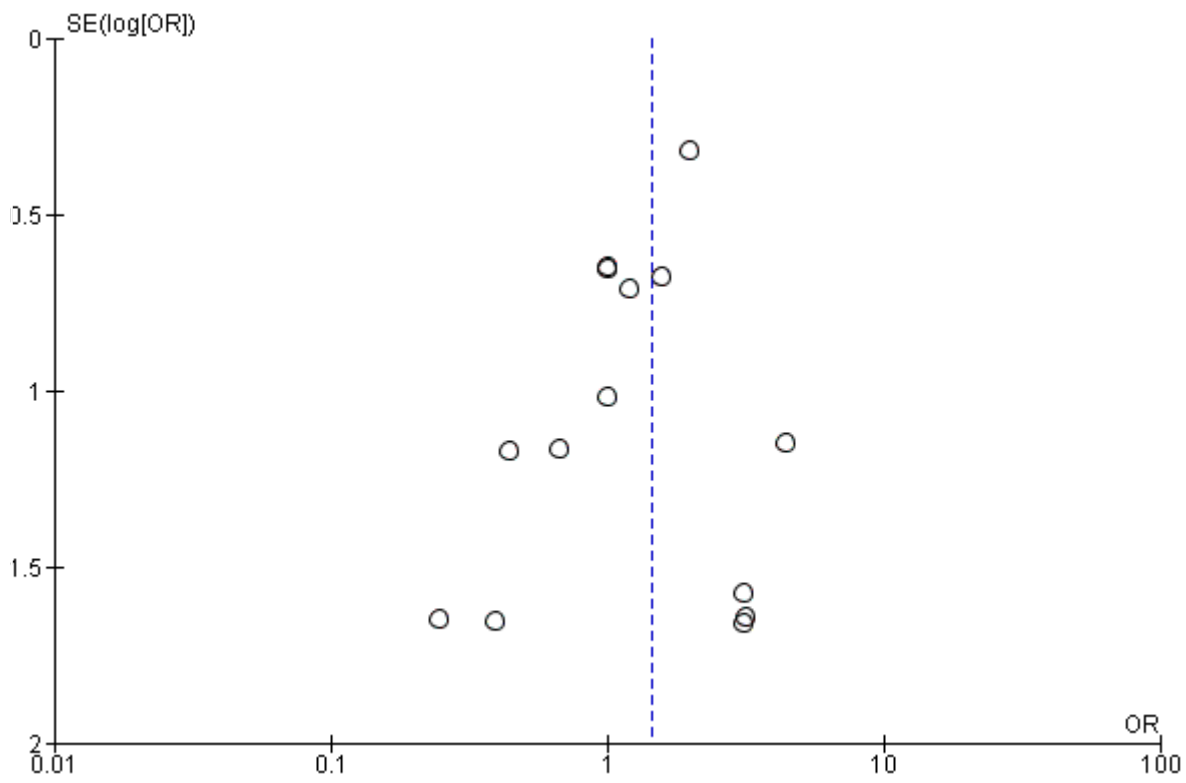

# Supplementary 1B

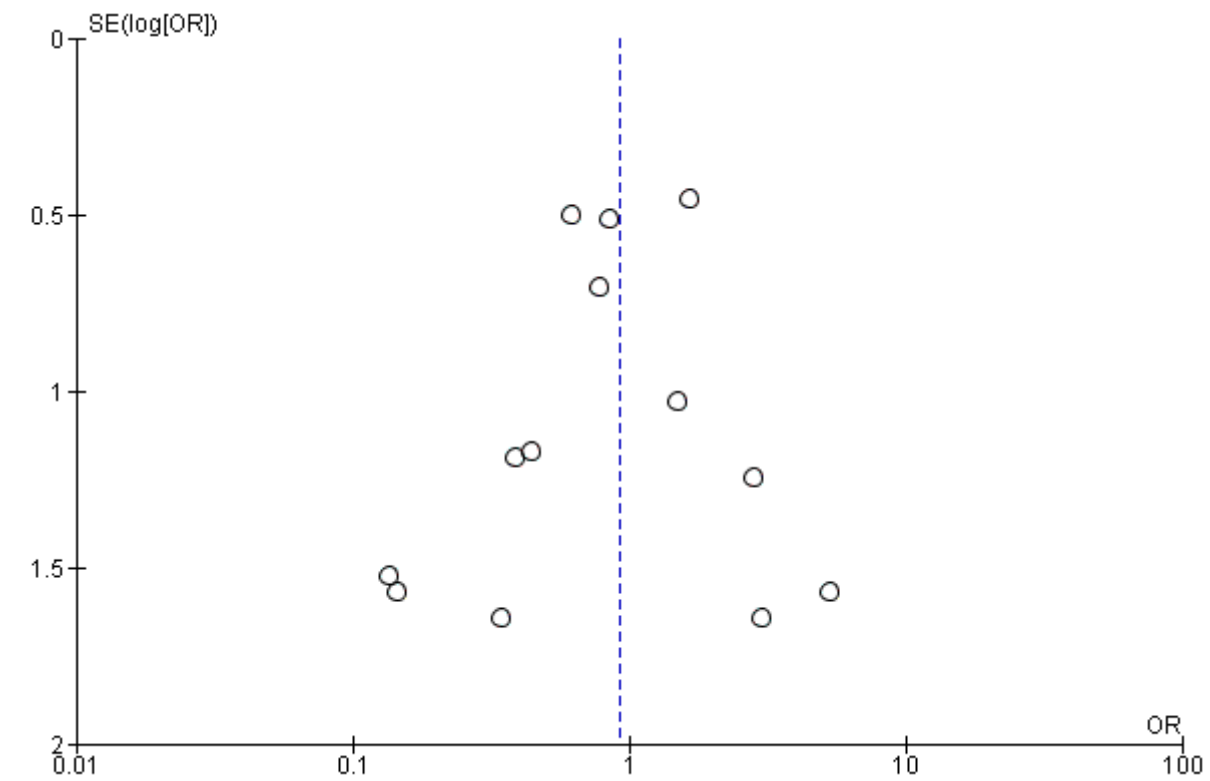

## Supplementary 1C

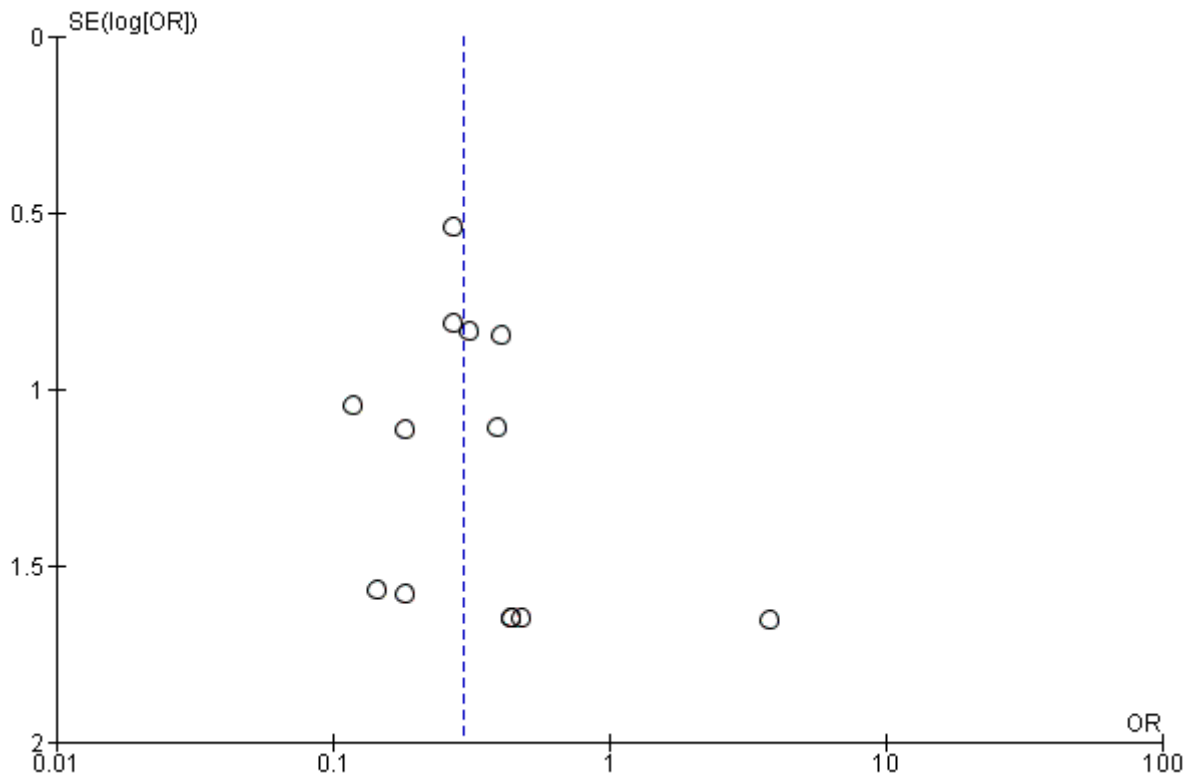

## Supplementary 1D

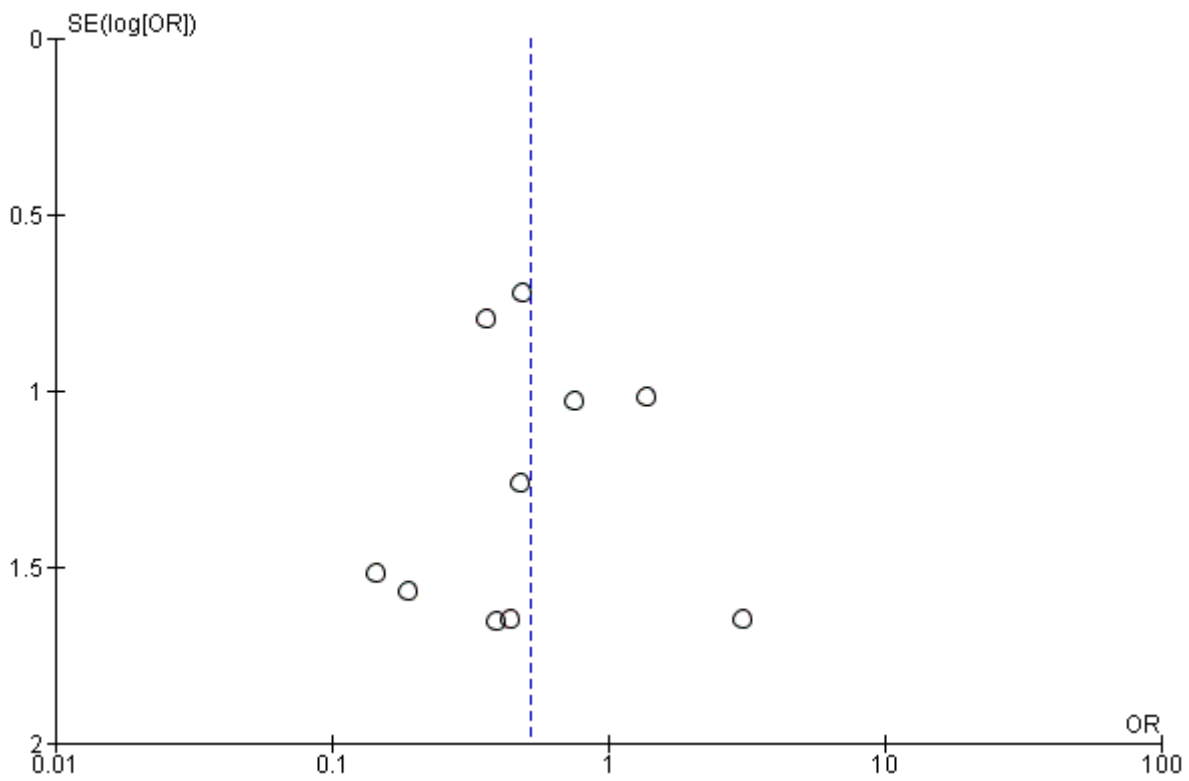

## Supplementary 1E

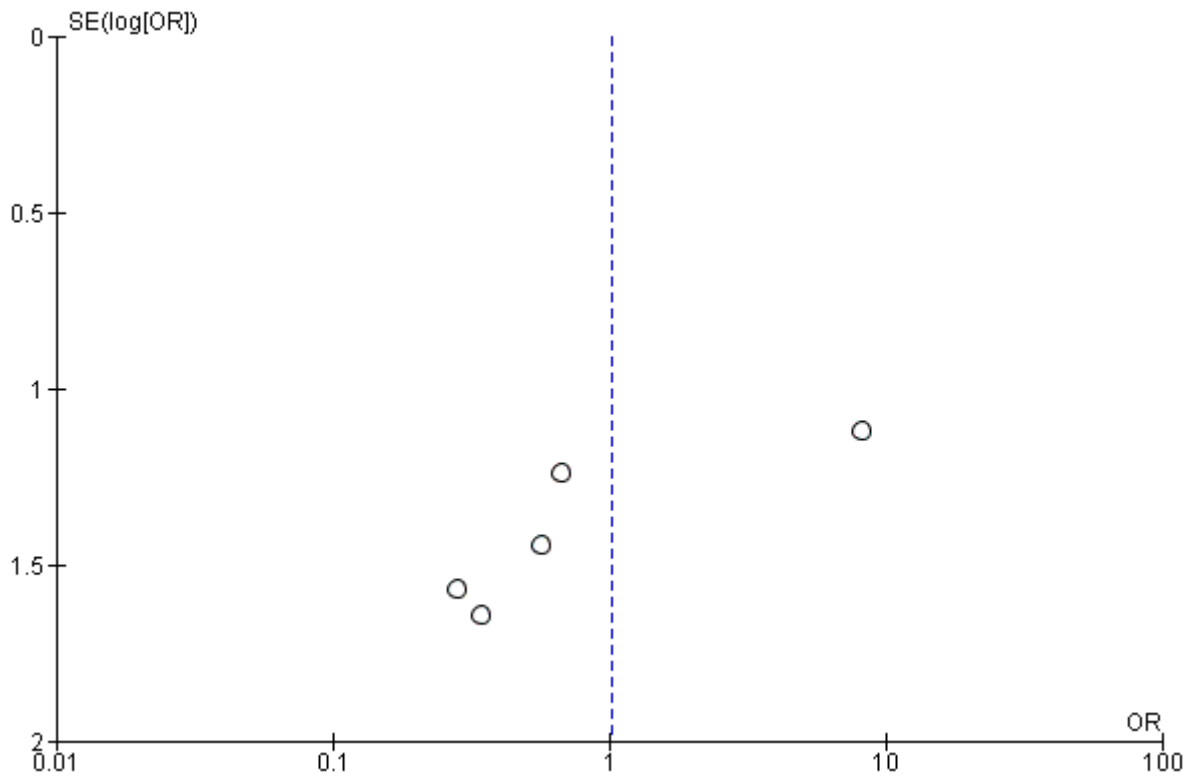

Supplementary 1. Figures of funnel plots of comparison; (A) anastomotic complications, (B) other intra-abdominal complications, (C) wound complications, (D) pulmonary complications, and (E) mortality
